# Supplementary material for: Intramolecular charge transfer interactions and molecular order of rod like mesogens
Source: Royal Society of Chemistry journal article supplement (doi:10.1039/c5ra22261c), 2015-01-01
Supplement: c5ra22261c1.pdf [file c5ra22261c1.pdf]

## ***Electronic Supplementary Information (ESI)***

### **Intramolecular Charge Transfer Interactions and Molecular Order of Rod like Mesogens**

M. Guruprasad Reddy,<sup>a</sup> Nitin. P. Lobo,<sup>b</sup> E. Varathan,<sup>c</sup> S. Easwaramoorthi,<sup>c</sup> and T. Narasimhaswamy\*<sup>a</sup>

<sup>a</sup> *Polymer Laboratory,* <sup>b</sup> *Chemical Physics Laboratory,* <sup>c</sup> *Chemical Laboratory, CSIR-Central Leather Research Institute, Adyar, Chennai, India-600020.*

## **Experimental Section**

### **Materials**

N,N-Dimethylaminobenzoic acid, 4-Hydroxy benzaldehyde, 4-Dimethylamino pyridine (DMAP), Dicyclohexylcarbodiimide (DCC), 10% Pd/C, Ammoniumformate (HCOONH<sub>4</sub>), 4-Hydroxy acetanilide, n-bromoalkanes (C<sub>2</sub>-C<sub>12</sub>, even number carbons only) are used as received (Aldrich, USA). Sodium Phosphate Monobasic anhydrous (NaH<sub>2</sub>PO<sub>4</sub>), Sodium Chlorite (NaClO<sub>2</sub>) Tetrahydrofuran (THF), Dichloromethane (DCM), Diethyl ether, Potassium hydroxide, Ethanol, Isopropyl alcohol, heptane are used without further purification (MERCK, India)

### **Synthesis of 4- formylphenyl 4-(dimethylamino) benzoate (1)**

In a representative experiment, 4-(Dimethylamino) benzoic acid (4 g, 0.0242 mole) and 4-hydroxy benzaldehyde (2.2 g, 0.0242 mole) were placed in a 250 ml conical flask. To that 50 ml dichloromethane and 50 ml tetrahydrofuran were added and the solution was stirred with magnetic stirrer. After one hour, dicyclohexylcarbodiimide (4.9 g, 0.0242 mole) dissolved in 25 ml dichloromethane and catalytic amount of 4-dimethylamino pyridine (0.29 g, 0.0024 mole) were added to the reaction mixture.<sup>1</sup> The stirring was continued for 10 hours, then the reaction mixture was filtered and filtrate was concentrated by evaporating the solvent. The semi-solid obtained was re dissolved in dichloromethane and washed with 10%

HCl followed by 5 % KOH solution. The solid obtained was purified by recrystallization in isopropanol.

Yield: 68%, m.p-163.5 °C, FT-IR (KBR,  $\text{cm}^{-1}$ ): 2928, 2851 ( $\text{C-H}_{\text{str}}$ ), 1718 ( $\text{C=O}_{\text{str}}$ ), 1692 ( $-\text{HC=O}$ ), 1593, 1500 ( $\text{C=C}_{\text{str}}$  aromatic), 1409, 1356 ( $\text{C-H}_{\text{bend}}$ ), 1261, 1206, ( $\text{C-O-C}_{\text{asym}}$  &  $\text{sym}_{\text{str}}$  of ester and ether respectively);  $^1\text{H}$  NMR (400 MHz,  $\text{CDCl}_3$ ):  $\delta$  9.92 (s, 1H), 7.97 (d,  $J = 7.9$  Hz, 2H), 7.87 (d,  $J = 8.2$  Hz, 2H), 7.31 (d,  $J = 7.7$  Hz, 2H), 6.63 (d,  $J = 8.7$  Hz, 2H), 3.01 (s, 6H);  $^{13}\text{C}$  NMR (100 MHz,  $\text{CDCl}_3$ ):  $\delta$  191.1, 164.7, 156.3, 153.9, 133.6, 132.1, 131.2, 122.7, 115.1, 110.9, 40.1.

### **Synthesis of 4-((4-(dimethylamino) benzoyl) oxy) benzoic acid (2)**

In a representative experiment, 4- formylphenyl 4-(dimethylamino) benzoate (4 g, 0.0148 moles) and resorcinol (2.4 g, 0.0222 moles) dissolved in 140 ml tert-butyl alcohol. Independently, a mixture of sodium phosphate monobasic anhydrous ( $\text{NaH}_2\text{PO}_4$ ) (5.3 g, 0.0445 moles) and sodium chlorite ( $\text{NaClO}_2$ ) (8 g, 0.0888 moles) were dissolved in 30 ml water.<sup>2</sup> The aqueous solution was added in a drop wise manner into the tert-butyl alcohol solution over a 10-min period. The pale yellow reaction mixture was, then stirred at room temperature overnight. Volatile components were removed in vacuo and the residue was dissolved in 100 ml water. The aqueous solution was acidified to pH 3 by adding 1 N aqueous HCl solution. The liberated white precipitate was isolated, washed successively with water and hexane, and the solid was dried and recrystallized from 1-Propanol.

### **4-((4-(dimethylamino) benzoyl) oxy) benzoic acid (2)**

Yield: 62%, m.p-223.1 °C FT-IR (KBr,  $\text{cm}^{-1}$ ): 2921, 2851 ( $\text{C-H}_{\text{str}}$ ), 2558 ( $\text{O-H}_{\text{str}}$  of carboxylic acid), 1725 ( $\text{C=O}_{\text{str}}$ ), 1681 ( $\text{C=O}_{\text{str}}$  of carboxylic acid), 1605, 1512 ( $\text{C=C}_{\text{str}}$  aromatic), 1467, 1427 ( $\text{C-H}_{\text{ben}}$ ), 1255, 1167 ( $\text{C-O-C}_{\text{asym}}$  &  $\text{sym}_{\text{str}}$  of ester and ether);  $^1\text{H}$  NMR (400 MHz,  $\text{DMSO-d}_6$ )  $\delta$  8.03 (d,  $J = 8.4$  Hz, 2H), 7.94 (d,  $J = 8.8$  Hz, 2H), 7.31 (d,  $J = 8.4$

Hz, 2H), 6.75 (d,  $J = 8.8$  Hz, 2H), 3.06 (s, 6H);  $^{13}\text{C}$  NMR (100 MHz, DMSO- $d_6$ )  $\delta$  167.1, 164.6, 154.9, 154.1, 132.0, 131.1, 128.4, 122.3, 114.6, 111.2, 40.0.

### Synthesis of 1-(benzyloxy)-4-(dodecyloxy) benzene (3)

In a representative experiment, 4-(benzyloxy) phenol (4 g, 0.0199 moles) dissolved in 100 ml ethanol, KOH (2.8 g, 0.0499 moles) dissolved in 25 ml distilled water and kept reflux for half an hour and then 1-bromododecane (4.7 ml, 0.0199 moles) added drop by drop using pressure equalizing dropping funnel.<sup>2</sup> The reaction progress check by TLC. The reaction mixture was poured in distilled water the obtained solid was filtered and recrystallized by isopropanol.

The similar procedure was used for 1-(benzyloxy)-4-(ethoxy)benzene, 1-(benzyloxy)-4-(butoxy)benzene, 1-(benzyloxy)-4-(hexyloxy)benzene, 1-(benzyloxy)-4-(octyloxy) benzene and 1-(benzyloxy)-4-(decyloxy)benzene.

### 1-(benzyloxy)-4-(dodecyloxy) benzene (3f)

Yield: 63%, m.p-80.5 °C, FT-IR (KBr,  $\text{cm}^{-1}$ ): 2998, 2889 (C-H<sub>str</sub>), 1559, 1512 (C=C<sub>str</sub> aromatic), 1460, 1430 (C-H<sub>ben</sub>), 1245, 1160 (C-O-C<sub>asym & sym str</sub> of ether);  $^1\text{H}$  NMR (500 MHz,  $\text{CDCl}_3$ )  $\delta$  7.42 (d,  $J = 7.3$  Hz, 2H), 7.38 (t,  $J = 7.5$  Hz, 2H), 7.31 (t,  $J = 7.2$  Hz, 1H), 6.90 (d,  $J = 9.1$  Hz, 2H), 6.82 (d,  $J = 9.1$  Hz, 2H), 5.01 (s, 2H), 3.89 (t,  $J = 6.7$  Hz, 2H), 1.80 (m, 2H), 1.52 – 1.08 (m, 18H), 0.89 (t,  $J = 6.9$  Hz, 3H);  $^{13}\text{C}$  NMR (125 MHz,  $\text{CDCl}_3$ )  $\delta$  153.6, 152.9, 137.4, 128.6, 127.9, 127.5, 115.8, 115.4, 70.7, 68.9, 32.0, 29.7, 29.7, 29.7, 29.7, 29.5, 29.4, 29.4, 26.1, 22.8, 14.2.

### Synthesis of 4-(dodecyloxy)phenol (4)

In typical experiment, 1-(benzyloxy)-4-(dodecyloxy)benzene (2 g, 0.0054 mole) and ammonium formate (2.67 g, 0.054 mole) dissolved in 100 ml THF and 10% Pd/C (0.2 g) was added and stirred at room temperature 12 hrs. under nitrogen atmosphere.<sup>3</sup> The product purity

was checked by TLC. After completion of the reaction the solid Pd/C was filtered by celite powder.

The similar procedure was used for making other compounds homologues namely 4-(ethoxy)phenol, 4-(butoxy)phenol, 4-(hexyloxy)phenol, 4-(octyloxy)phenol and 4-(decyloxy)phenol.

#### **4-dodecyloxyphenol (4f)**

Yield: 63%, m.p-80.9°C, FT-IR (KBr,  $\text{cm}^{-1}$ ): 3458 (-O-H<sub>str</sub>), 2959, 2916 (C-H<sub>str</sub>), 1601, 1510 (C-C<sub>str</sub> aromatic), 1441, 1315 (C-H<sub>ben</sub>), 1167, 1129 (C-O-C<sub>asym & sym str</sub> of ether); <sup>1</sup>H NMR (500 MHz, CDCl<sub>3</sub>)  $\delta$  6.71 (q,  $J = 9.0$  Hz, 4H), 5.44 (s, 1H), 3.89 (t,  $J = 6.7$  Hz, 2H), 1.80 (m, 2H), 1.52 – 1.08 (m, 18H), 0.89 (t,  $J = 6.9$  Hz, 3H); <sup>13</sup>C NMR (125 MHz, CHCl<sub>3</sub>)  $\delta$  153.2, 149.5, 116.1, 115.8, 68.9, 32.0, 29.7, 29.7, 29.7, 29.7, 29.5, 29.4, 29.4, 26.1, 22.8, 14.2.

#### **4-((4-(dodecyloxy)phenoxy)carbonyl)phenyl-4-(dimethylamino)benzoate (DdPCPDB) (5f)**

In a representative experiment, 4-((4-(dimethylamino)benzoyl)oxy) benzoic acid (0.5 g, 0.0017 mole) and 4-dodecyloxyphenol (0.48 g, 0.0017 mole) were placed in a 100 ml conical flask. To that 10 ml dichloromethane and 10 ml tetrahydrofuran were added and the solution was stirred with magnetic stirrer. After one hour, dicyclohexylcarbodiimide (0.36 g, 0.0017 mole) dissolved in 5 ml dichloromethane and catalytic amount of 4-dimethylamino pyridine (0.036 g, 0.00017 mole) were added to the reaction mixture.<sup>1</sup> The stirring was continued for 10 hours, then the reaction mixture was filtered and filtrate was concentrated by evaporating the solvent. The semisolid obtained was re dissolved in dichloromethane and washed with 10% HCl followed by 5 % KOH solution. The solid obtained was purified by recrystallization in heptane.

#### **4-((4-(dodecyloxy)phenoxy)carbonyl)phenyl-4-(dimethylamino)benzoate (DdPCPDB) (5f)**

Yield: 60%, m.p-113.1°C, FT-IR (KBR,  $\text{cm}^{-1}$ ): 2995, 2869 ( $\text{C-H}_{\text{str}}$ ), 1719 ( $\text{C=O}_{\text{str}}$ ), 1623 and 1579 ( $\text{C=C}_{\text{str}}$  aromatic), 1419, 1354 ( $\text{C-H}_{\text{bend}}$ ), 1260, 1203, ( $\text{C-O-C}_{\text{asym}}$  &  $\text{sym str}$  of ester and ether respectively);  $^1\text{H}$  NMR (400 MHz,  $\text{CDCl}_3$ )  $\delta$  8.17 (d,  $J = 8.2$  Hz, 2H), 8.00 (d,  $J = 8.4$  Hz, 2H), 7.27 (d,  $J = 8.2$  Hz, 2H), 7.04 (d,  $J = 8.5$  Hz, 2H), 6.85 (d,  $J = 8.7$  Hz, 2H), 6.66 (d,  $J = 8.4$  Hz, 2H), 3.89 (t,  $J = 6.7$  Hz, 2H), 3.01 (s, 6H), 1.81 – 1.65 (m, 2H), 1.52 – 1.08 (m, 18H), 0.89 (t,  $J = 6.9$  Hz, 3H);  $^{13}\text{C}$  NMR (100 MHz,  $\text{CDCl}_3$ )  $\delta$  164.9, 164.8, 156.9, 155.6, 153.7, 144.2, 132.1, 131.6, 126.7, 122.4, 122.1, 115.6, 115.1, 111.0, 68.4, 40.2, 31.9, 29.6, 29.6, 29.6, 29.6, 29.4, 29.3, 29.3, 26.0, 22.7, 14.1.

#### **4-((4-ethoxyphenoxy)carbonyl)phenyl 4-(dimethylamino)benzoate (EPCPDB) (5a)**

Yield: 65%, m.p-197.4°C, FT-IR (KBR,  $\text{cm}^{-1}$ ): 2990, 2860 ( $\text{C-H}_{\text{str}}$ ), 1727 ( $\text{C=O}_{\text{str}}$ ), 1603 and 1574 ( $\text{C=C}_{\text{str}}$  aromatic), 1409, 1356 ( $\text{C-H}_{\text{bend}}$ ), 1261, 1206, ( $\text{C-O-C}_{\text{asym}}$  &  $\text{sym str}$  of ester and ether respectively);  $^1\text{H}$  NMR (400 MHz,  $\text{CDCl}_3$ )  $\delta$  8.25 (d,  $J = 8.4$  Hz, 2H), 8.06 (d,  $J = 8.6$  Hz, 2H), 7.35 (d,  $J = 8.4$  Hz, 2H), 7.12 (d,  $J = 8.6$  Hz, 2H), 6.93 (d,  $J = 8.7$  Hz, 2H), 6.71 (d,  $J = 8.6$  Hz, 2H), 4.04 (q,  $J = 6.9$  Hz, 2H), 3.09 (s, 6H), 1.43 (t,  $J = 6.9$  Hz, 3H);  $^{13}\text{C}$  NMR (100 MHz,  $\text{CDCl}_3$ )  $\delta$  165.0, 164.9, 156.7, 155.7, 153.9, 144.2, 132.1, 131.6, 126.6, 122.4, 122.1, 115.2, 115.1, 110.8, 63.8, 40.1, 14.8.

#### **4-((4-butoxyphenoxy)carbonyl)phenyl 4-(dimethylamino)benzoate (BPCPDB) (5b)**

Yield: 66%, m.p- 158.7°C, FT-IR (KBR,  $\text{cm}^{-1}$ ): 2995, 2872 ( $\text{C-H}_{\text{str}}$ ), 1725 ( $\text{C=O}_{\text{str}}$ ), 1614 and 1570 ( $\text{C=C}_{\text{str}}$  aromatic), 1415, 1359 ( $\text{C-H}_{\text{bend}}$ ), 1260, 1204, ( $\text{C-O-C}_{\text{asym}}$  &  $\text{sym str}$  of ester and ether respectively);  $^1\text{H}$  NMR (400 MHz,  $\text{CDCl}_3$ )  $\delta$  8.25 (d,  $J = 7.8$  Hz, 2H), 8.06 (d,  $J = 8.1$  Hz, 2H), 7.35 (d,  $J = 7.8$  Hz, 2H), 7.12 (d,  $J = 7.9$  Hz, 2H), 6.93 (d,  $J = 8.1$  Hz, 2H), 6.70 (d,  $J = 8.2$  Hz, 2H), 3.97 (t,  $J = 6.3$  Hz, 2H), 3.09 (s, 6H), 1.84 – 1.72 (m, 2H), 1.50 (dd,  $J = 14.7, 7.4$  Hz, 2H), 0.98 (t,  $J = 7.3$  Hz, 3H);  $^{13}\text{C}$  NMR (100 MHz,  $\text{CDCl}_3$ )  $\delta$  165.0, 164.9, 156.7, 155.7, 153.9, 144.2, 132.1, 131.6, 126.6, 122.4, 122.1, 115.2, 115.1, 110.8, 68.1, 40.0, 31.3, 19.2, 13.9.

#### **4-((4-(hexyloxy)phenoxy)carbonyl)phenyl 4-(dimethylamino)benzoate (HPCPDB) (5c)**

Yield: 63%, m.p-127.9°C, FT-IR (KBR,  $\text{cm}^{-1}$ ): 2990, 2860 ( $\text{C-H}_{\text{str}}$ ), 1720 ( $\text{C=O}_{\text{str}}$ ), 1603 and 1574 ( $\text{C=C}_{\text{str}}$  aromatic), 1409, 1356 ( $\text{C-H}_{\text{bend}}$ ), 1261, 1206, ( $\text{C-O-C}_{\text{asym \& sym str}}$  of ester and ether respectively);  $^1\text{H}$  NMR (400 MHz,  $\text{CDCl}_3$ )  $\delta$  8.18 (d,  $J = 8.1$  Hz, 2H), 8.01 (d,  $J = 8.4$  Hz, 2H), 7.28 (d,  $J = 8.2$  Hz, 2H), 7.05 (d,  $J = 8.5$  Hz, 2H), 6.86 (d,  $J = 8.3$  Hz, 2H), 6.70 (d,  $J = 8.5$  Hz, 2H), 3.89 (t,  $J = 6.5$  Hz, 2H), 3.03 (s, 6H), 1.80 – 1.66 (m, 2H), 1.36 (m, 6H), 0.84 (t,  $J = 6.0$  Hz, 3H);  $^{13}\text{C}$  NMR (100 MHz,  $\text{CDCl}_3$ )  $\delta$  164.9, 164.7, 156.9, 155.6, 153.5, 144.2, 132.1, 131.6, 126.7, 122.4, 122.1, 116.0, 115.1, 111.3, 68.4, 40.3, 31.6, 29.2, 25.7, 22.6, 14.0.

#### **4-((4-(octyloxy)phenoxy)carbonyl)phenyl 4-(dimethylamino)benzoate (OPCPDB) (5d)**

Yield: 61%, m.p-120.2°C, FT-IR (KBR,  $\text{cm}^{-1}$ ): 2998, 2869 ( $\text{C-H}_{\text{str}}$ ), 1728 ( $\text{C=O}_{\text{str}}$ ), 1612 and 1570 ( $\text{C=C}_{\text{str}}$  aromatic), 1429, 1350 ( $\text{C-H}_{\text{bend}}$ ), 1260, 1216, ( $\text{C-O-C}_{\text{asym \& sym str}}$  of ester and ether respectively);  $^1\text{H}$  NMR (400 MHz,  $\text{CDCl}_3$ )  $\delta$  8.25 (d,  $J = 8.4$  Hz, 2H), 8.06 (d,  $J = 8.7$  Hz, 2H), 7.35 (d,  $J = 8.4$  Hz, 2H), 7.12 (d,  $J = 8.7$  Hz, 2H), 6.93 (d,  $J = 8.7$  Hz, 2H), 6.71 (d,  $J = 8.7$  Hz, 2H), 3.96 (t,  $J = 6.5$  Hz, 2H), 3.09 (s, 6H), 1.85 – 1.72 (m, 2H), 1.52 – 1.17 (m, 10H), 0.89 (t,  $J = 6.3$  Hz, 3H);  $^{13}\text{C}$  NMR (100 MHz,  $\text{CDCl}_3$ )  $\delta$  165.0, 164.9, 156.9, 155.7, 153.9, 144.2, 132.1, 131.6, 126.6, 122.4, 122.1, 115.2, 115.1, 110.8, 68.8, 40.1, 31.9, 29.6, 29.5, 29.4, 29.3, 22.7, 14.1.

#### **4-((4-(decyloxy)phenoxy)carbonyl)phenyl 4-(dimethylamino)benzoate (DPCPDB) (5e)**

Yield: 67%, m.p-119.1°C, FT-IR (KBR,  $\text{cm}^{-1}$ ): 2989, 2895 ( $\text{C-H}_{\text{str}}$ ), 1722 ( $\text{C=O}_{\text{str}}$ ), 1623 and 1571 ( $\text{C=C}_{\text{str}}$  aromatic), 1411, 1353 ( $\text{C-H}_{\text{bend}}$ ), 1259, 1207, ( $\text{C-O-C}_{\text{asym \& sym str}}$  of ester and ether respectively);  $^1\text{H}$  NMR (400 MHz,  $\text{CDCl}_3$ )  $\delta$  8.25 (d,  $J = 8.3$  Hz, 2H), 8.06 (d,  $J = 8.5$  Hz, 2H), 7.35 (d,  $J = 8.3$  Hz, 2H), 7.12 (d,  $J = 8.5$  Hz, 2H), 6.93 (d,  $J = 8.6$  Hz, 2H), 6.71 (d,  $J = 8.6$  Hz, 2H), 3.96 (t,  $J = 6.4$  Hz, 2H), 3.09 (s, 6H), 1.86 – 1.71 (m, 2H), 1.53 – 1.17 (m, 14H), 0.89 (t,  $J = 6.3$  Hz, 3H);  $^{13}\text{C}$  NMR (100 MHz,  $\text{CDCl}_3$ )  $\delta$  165.0, 164.9, 156.9,

155.7, 153.9, 144.2, 132.1, 131.6, 126.6, 122.4, 122.1, 115.2, 115.1, 110.8, 68.4, 40.1, 31.9,  
29.6, 29.6, 29.4, 29.3, 29.3, 26.0, 22.7, 14.1.

**Table S<sub>1</sub>:** Single crystal data for BPCPDB

|                                   |                                                                                                                                            |
|-----------------------------------|--------------------------------------------------------------------------------------------------------------------------------------------|
| Identification code               | BPCPDB                                                                                                                                     |
| Empirical formula                 | C <sub>26</sub> H <sub>27</sub> NO <sub>5</sub>                                                                                            |
| Formula weight                    | 433.49                                                                                                                                     |
| Temperature                       | 293(2) K                                                                                                                                   |
| Wavelength                        | 0.71073 Å                                                                                                                                  |
| Crystal system, space group       | Triclinic, P -1                                                                                                                            |
| Unit cell dimensions              | a = 9.8058(2) Å    alpha = 64.9330(10) deg.<br>b = 15.4400(3) Å    beta = 83.4090(10) deg.<br>c = 16.9339(3) Å    gamma = 88.3180(10) deg. |
| Volume                            | 2306.46(8) Å <sup>3</sup>                                                                                                                  |
| Z, Calculated density             | 4, 1.248 Mg/m <sup>3</sup>                                                                                                                 |
| Absorption coefficient            | 0.086 mm <sup>-1</sup>                                                                                                                     |
| F(000)                            | 920                                                                                                                                        |
| Crystal size                      | 0.20 x 0.15 x 0.10 mm                                                                                                                      |
| Theta range for data collection   | 1.34 to 26.45 deg.                                                                                                                         |
| Limiting indices                  | -12 ≤ h ≤ 12, -18 ≤ k ≤ 19, -21 ≤ l ≤ 21                                                                                                   |
| Reflections collected / unique    | 35532 / 9485 [R(int) = 0.0644]                                                                                                             |
| Completeness to theta = 26.45     | 99.6 %                                                                                                                                     |
| Absorption correction             | Semi-empirical from equivalents                                                                                                            |
| Max. and min. transmission        | 0.9914 and 0.9829                                                                                                                          |
| Refinement method                 | Full-matrix least-squares on F <sup>2</sup>                                                                                                |
| Data / restraints / parameters    | 9485 / 0 / 583                                                                                                                             |
| Goodness-of-fit on F <sup>2</sup> | 0.927                                                                                                                                      |
| Final R indices [I > 2σ(I)]       | R1 = 0.0510, wR2 = 0.1038                                                                                                                  |
| R indices (all data)              | R1 = 0.1539, wR2 = 0.1445                                                                                                                  |
| Largest diff. peak and hole       | 0.206 and -0.174 e.Å <sup>-3</sup>                                                                                                         |
| <b>CCDC No.:</b>                  | <b>1415623</b>                                                                                                                             |

**Table S2.** Atomic coordinates ( $\text{\AA} \times 10^4$ ) and equivalent isotropic displacement parameters ( $\text{\AA}^2 \times 10^3$ ) for BPCPDB.  $U(\text{eq})$  is defined as one third of the trace of the orthogonalized  $U^{ij}$  tensor

|        | x        | y        | z        | $U(\text{eq})$ |
|--------|----------|----------|----------|----------------|
| C(26)  | 6275(5)  | 10150(3) | 7129(3)  | 159(2)         |
| C(1')  | 7885(4)  | 6641(3)  | -1386(3) | 119(1)         |
| C(1)   | 6711(4)  | 803(2)   | -948(2)  | 97(1)          |
| C(2)   | 5773(3)  | 2298(2)  | -1963(2) | 90(1)          |
| C(2')  | 10263(4) | 6356(3)  | -1075(3) | 120(1)         |
| C(3)   | 6269(3)  | 2117(2)  | -512(2)  | 57(1)          |
| C(3')  | 8813(3)  | 7288(2)  | -460(2)  | 61(1)          |
| C(4')  | 7577(3)  | 7737(2)  | -385(2)  | 64(1)          |
| C(4)   | 6532(3)  | 1534(2)  | 350(2)   | 64(1)          |
| C(5')  | 7411(3)  | 8238(2)  | 121(2)   | 62(1)          |
| C(5)   | 6483(3)  | 1888(2)  | 969(2)   | 62(1)          |
| C(6')  | 8443(3)  | 8331(2)  | 567(2)   | 54(1)          |
| C(6)   | 6179(2)  | 2833(2)  | 774(2)   | 50(1)          |
| C(7)   | 5918(3)  | 3415(2)  | -76(2)   | 59(1)          |
| C(7')  | 9687(3)  | 7917(2)  | 474(2)   | 61(1)          |
| C(8')  | 9875(3)  | 7405(2)  | -24(2)   | 65(1)          |
| C(8)   | 5953(3)  | 3071(2)  | -702(2)  | 62(1)          |
| C(9)   | 6199(3)  | 3174(2)  | 1450(2)  | 56(1)          |
| C(9')  | 8156(3)  | 8844(2)  | 1119(2)  | 61(1)          |
| C(10') | 9037(3)  | 9361(2)  | 2084(2)  | 59(1)          |
| C(10)  | 6026(3)  | 4570(2)  | 1704(2)  | 55(1)          |
| C(11') | 8165(3)  | 8965(2)  | 2844(2)  | 71(1)          |
| C(11)  | 5209(3)  | 4354(2)  | 2480(2)  | 65(1)          |
| C(12)  | 5392(3)  | 4863(2)  | 2963(2)  | 61(1)          |
| C(12') | 8001(3)  | 9436(2)  | 3381(2)  | 70(1)          |
| C(13') | 8703(3)  | 10279(2) | 3168(2)  | 59(1)          |
| C(13)  | 6379(3)  | 5585(2)  | 2666(2)  | 51(1)          |
| C(14)  | 7180(3)  | 5797(2)  | 1876(2)  | 59(1)          |
| C(14') | 9603(3)  | 10646(2) | 2409(2)  | 72(1)          |
| C(15') | 9767(3)  | 10185(2) | 1863(2)  | 72(1)          |
| C(15)  | 7012(3)  | 5288(2)  | 1397(2)  | 59(1)          |



|        |         |          |          |        |
|--------|---------|----------|----------|--------|
| C(16') | 8443(3) | 10759(2) | 3763(2)  | 71(1)  |
| C(16)  | 6616(3) | 6162(2)  | 3145(2)  | 57(1)  |
| C(17') | 9073(3) | 12050(2) | 4043(2)  | 66(1)  |
| C(17)  | 6007(3) | 6368(2)  | 4436(2)  | 64(1)  |
| C(18') | 8426(3) | 12892(2) | 3741(2)  | 79(1)  |
| C(18)  | 5078(3) | 7020(2)  | 4475(2)  | 73(1)  |
| C(19') | 8317(3) | 13422(2) | 4229(2)  | 81(1)  |
| C(19)  | 5251(3) | 7500(2)  | 4990(2)  | 71(1)  |
| C(20)  | 6374(3) | 7308(2)  | 5456(2)  | 63(1)  |
| C(20') | 8836(3) | 13095(2) | 5015(2)  | 68(1)  |
| C(21') | 9482(3) | 12235(2) | 5321(2)  | 84(1)  |
| C(21)  | 7287(3) | 6627(2)  | 5420(2)  | 72(1)  |
| C(22') | 9609(3) | 11707(2) | 4824(2)  | 86(1)  |
| C(22)  | 7110(3) | 6155(2)  | 4909(2)  | 72(1)  |
| C(23)  | 5815(3) | 8501(2)  | 5987(2)  | 79(1)  |
| C(23') | 9152(3) | 13361(2) | 6278(2)  | 83(1)  |
| C(24') | 8871(4) | 14156(2) | 6573(2)  | 89(1)  |
| C(24)  | 6414(4) | 8895(2)  | 6555(2)  | 94(1)  |
| C(25') | 9183(4) | 13890(3) | 7476(2)  | 103(1) |
| C(25)  | 5701(5) | 9733(3)  | 6564(2)  | 125(2) |
| C(26') | 8960(4) | 14704(3) | 7761(2)  | 112(1) |
| N(1)   | 6328(3) | 1770(2)  | -1132(2) | 75(1)  |
| N(1')  | 8966(3) | 6750(2)  | -932(2)  | 82(1)  |
| O(1')  | 7071(2) | 9195(1)  | 1221(1)  | 79(1)  |
| O(1)   | 6517(2) | 2726(1)  | 2176(1)  | 78(1)  |
| O(2')  | 9255(2) | 8896(1)  | 1524(1)  | 69(1)  |
| O(2)   | 5841(2) | 4113(1)  | 1168(1)  | 66(1)  |
| O(3)   | 7419(2) | 6818(1)  | 2891(1)  | 77(1)  |
| O(3')  | 7605(3) | 10502(2) | 4388(2)  | 116(1) |
| O(4)   | 5809(2) | 5873(1)  | 3919(1)  | 76(1)  |
| O(4')  | 9251(2) | 11542(1) | 3515(1)  | 76(1)  |
| O(5)   | 6645(2) | 7727(1)  | 5989(1)  | 79(1)  |
| O(5')  | 8691(2) | 13686(2) | 5435(1)  | 87(1)  |

**Table S3.** Bond lengths [ $\text{\AA}$ ] and angles [deg] for BPCPDB

|              |          |
|--------------|----------|
| C(26)-C(25)  | 1.521(4) |
| C(26)-H(26A) | 0.9600   |
| C(26)-H(26B) | 0.9600   |
| C(26)-H(26C) | 0.9600   |
| C(1')-N(1')  | 1.432(4) |
| C(1')-H(1'1) | 0.9600   |
| C(1')-H(1'2) | 0.9600   |
| C(1')-H(1'3) | 0.9600   |
| C(1)-N(1)    | 1.436(3) |
| C(1)-H(1A)   | 0.9600   |
| C(1)-H(1B)   | 0.9600   |
| C(1)-H(1C)   | 0.9600   |

|              |          |
|--------------|----------|
| C(2)-N(1)    | 1.455(3) |
| C(2)-H(2A)   | 0.9600   |
| C(2)-H(2B)   | 0.9600   |
| C(2)-H(2C)   | 0.9600   |
| C(2')-N(1')  | 1.434(4) |
| C(2')-H(2'1) | 0.9600   |
| C(2')-H(2'2) | 0.9600   |
| C(2')-H(2'3) | 0.9600   |
| C(3)-N(1)    | 1.363(3) |
| C(3)-C(8)    | 1.402(3) |
| C(3)-C(4)    | 1.403(4) |
| C(3')-N(1')  | 1.370(3) |
| C(3')-C(4')  | 1.399(3) |
| C(3')-C(8')  | 1.401(4) |
| C(4)-C(5)    | 1.372(3) |
| C(4)-H(4)    | 0.9300   |
| C(4)-C(5)    | 1.368(3) |
| C(4)-H(4)    | 0.9300   |
| C(5)-C(6)    | 1.374(3) |
| C(5)-H(5)    | 0.9300   |
| C(5)-C(6)    | 1.383(3) |
| C(5)-H(5)    | 0.9300   |
| C(6)-C(7)    | 1.385(3) |
| C(6)-C(9)    | 1.462(3) |
| C(6)-C(7)    | 1.385(3) |
| C(6)-C(9)    | 1.451(3) |
| C(7)-C(8)    | 1.370(3) |
| C(7)-H(7)    | 0.9300   |
| C(7)-C(8)    | 1.375(3) |
| C(7)-H(7)    | 0.9300   |
| C(8)-H(8)    | 0.9300   |
| C(8)-H(8)    | 0.9300   |
| C(9)-O(1)    | 1.202(3) |
| C(9)-O(2)    | 1.369(3) |
| C(9')-O(1')  | 1.207(3) |
| C(9')-O(2')  | 1.364(3) |
| C(10)-C(15)  | 1.363(3) |
| C(10)-C(11)  | 1.369(4) |
| C(10)-O(2)   | 1.407(3) |
| C(10)-C(11)  | 1.372(3) |
| C(10)-C(15)  | 1.375(3) |
| C(10)-O(2)   | 1.395(3) |
| C(11)-C(12)  | 1.379(3) |
| C(11)-H(11)  | 0.9300   |
| C(11)-C(12)  | 1.381(3) |
| C(11)-H(11)  | 0.9300   |
| C(12)-C(13)  | 1.382(3) |
| C(12)-H(12)  | 0.9300   |
| C(12)-C(13)  | 1.377(3) |

|               |          |
|---------------|----------|
| C(12')-H(12') | 0.9300   |
| C(13')-C(14') | 1.379(4) |
| C(13')-C(16') | 1.482(4) |
| C(13)-C(14)   | 1.385(3) |
| C(13)-C(16)   | 1.474(3) |
| C(14)-C(15)   | 1.371(3) |
| C(14)-H(14)   | 0.9300   |
| C(14')-C(15') | 1.379(3) |
| C(14')-H(14') | 0.9300   |
| C(15')-H(15') | 0.9300   |
| C(15)-H(15)   | 0.9300   |
| C(16')-O(3')  | 1.190(3) |
| C(16')-O(4')  | 1.347(3) |
| C(16)-O(3)    | 1.196(3) |
| C(16)-O(4)    | 1.353(3) |
| C(17')-C(18') | 1.347(4) |
| C(17')-C(22') | 1.362(4) |
| C(17')-O(4')  | 1.412(3) |
| C(17)-C(18)   | 1.354(4) |
| C(17)-C(22)   | 1.369(4) |
| C(17)-O(4)    | 1.415(3) |
| C(18')-C(19') | 1.382(4) |
| C(18')-H(18') | 0.9300   |
| C(18)-C(19)   | 1.390(4) |
| C(18)-H(18)   | 0.9300   |
| C(19')-C(20') | 1.362(4) |
| C(19')-H(19') | 0.9300   |
| C(19)-C(20)   | 1.380(4) |
| C(19)-H(19)   | 0.9300   |
| C(20)-O(5)    | 1.366(3) |
| C(20)-C(21)   | 1.377(4) |
| C(20')-C(21') | 1.369(4) |
| C(20')-O(5')  | 1.370(3) |
| C(21')-C(22') | 1.393(4) |
| C(21')-H(21') | 0.9300   |
| C(21)-C(22)   | 1.373(4) |
| C(21)-H(21)   | 0.9300   |
| C(22')-H(22') | 0.9300   |
| C(22)-H(22)   | 0.9300   |
| C(23)-O(5)    | 1.425(3) |
| C(23)-C(24)   | 1.511(4) |
| C(23)-H(23A)  | 0.9700   |
| C(23)-H(23B)  | 0.9700   |
| C(23')-O(5')  | 1.422(3) |
| C(23')-C(24') | 1.517(4) |
| C(23')-H(23C) | 0.9700   |
| C(23')-H(23D) | 0.9700   |
| C(24')-C(25') | 1.472(4) |
| C(24')-H(24A) | 0.9700   |

|                     |          |
|---------------------|----------|
| C(24')-H(24B)       | 0.9700   |
| C(24)-C(25)         | 1.459(4) |
| C(24)-H(24C)        | 0.9700   |
| C(24)-H(24D)        | 0.9700   |
| C(25')-C(26')       | 1.528(4) |
| C(25')-H(25A)       | 0.9700   |
| C(25')-H(25B)       | 0.9700   |
| C(25)-H(25C)        | 0.9700   |
| C(25)-H(25D)        | 0.9700   |
| C(26')-H(26D)       | 0.9600   |
| C(26')-H(26E)       | 0.9600   |
| C(26')-H(26F)       | 0.9600   |
|                     |          |
| C(25)-C(26)-H(26A)  | 109.5    |
| C(25)-C(26)-H(26B)  | 109.5    |
| H(26A)-C(26)-H(26B) | 109.5    |
| C(25)-C(26)-H(26C)  | 109.5    |
| H(26A)-C(26)-H(26C) | 109.5    |
| H(26B)-C(26)-H(26C) | 109.5    |
| N(1')-C(1')-H(1'1)  | 109.5    |
| N(1')-C(1')-H(1'2)  | 109.5    |
| H(1'1)-C(1')-H(1'2) | 109.5    |
| N(1')-C(1')-H(1'3)  | 109.5    |
| H(1'1)-C(1')-H(1'3) | 109.5    |
| H(1'2)-C(1')-H(1'3) | 109.5    |
| N(1)-C(1)-H(1A)     | 109.5    |
| N(1)-C(1)-H(1B)     | 109.5    |
| H(1A)-C(1)-H(1B)    | 109.5    |
| N(1)-C(1)-H(1C)     | 109.5    |
| H(1A)-C(1)-H(1C)    | 109.5    |
| H(1B)-C(1)-H(1C)    | 109.5    |
| N(1)-C(2)-H(2A)     | 109.5    |
| N(1)-C(2)-H(2B)     | 109.5    |
| H(2A)-C(2)-H(2B)    | 109.5    |
| N(1)-C(2)-H(2C)     | 109.5    |
| H(2A)-C(2)-H(2C)    | 109.5    |
| H(2B)-C(2)-H(2C)    | 109.5    |
| N(1')-C(2')-H(2'1)  | 109.5    |
| N(1')-C(2')-H(2'2)  | 109.5    |
| H(2'1)-C(2')-H(2'2) | 109.5    |
| N(1')-C(2')-H(2'3)  | 109.5    |
| H(2'1)-C(2')-H(2'3) | 109.5    |
| H(2'2)-C(2')-H(2'3) | 109.5    |
| N(1)-C(3)-C(8)      | 121.9(3) |
| N(1)-C(3)-C(4)      | 121.3(3) |
| C(8)-C(3)-C(4)      | 116.8(2) |
| N(1')-C(3')-C(4')   | 121.2(3) |
| N(1')-C(3')-C(8')   | 121.8(3) |
| C(4')-C(3')-C(8')   | 117.0(2) |

|                      |          |
|----------------------|----------|
| C(5')-C(4')-C(3')    | 120.9(3) |
| C(5')-C(4')-H(4')    | 119.6    |
| C(3')-C(4')-H(4')    | 119.6    |
| C(5)-C(4)-C(3)       | 121.1(3) |
| C(5)-C(4)-H(4)       | 119.5    |
| C(3)-C(4)-H(4)       | 119.5    |
| C(6')-C(5')-C(4')    | 122.0(3) |
| C(6')-C(5')-H(5')    | 119.0    |
| C(4')-C(5')-H(5')    | 119.0    |
| C(4)-C(5)-C(6)       | 121.8(3) |
| C(4)-C(5)-H(5)       | 119.1    |
| C(6)-C(5)-H(5)       | 119.1    |
| C(5')-C(6')-C(7')    | 117.6(2) |
| C(5')-C(6')-C(9')    | 118.3(3) |
| C(7')-C(6')-C(9')    | 124.1(3) |
| C(7)-C(6)-C(5)       | 117.6(2) |
| C(7)-C(6)-C(9)       | 123.3(2) |
| C(5)-C(6)-C(9)       | 119.1(2) |
| C(8)-C(7)-C(6)       | 121.4(3) |
| C(8)-C(7)-H(7)       | 119.3    |
| C(6)-C(7)-H(7)       | 119.3    |
| C(8')-C(7')-C(6')    | 121.4(3) |
| C(8')-C(7')-H(7')    | 119.3    |
| C(6')-C(7')-H(7')    | 119.3    |
| C(7')-C(8')-C(3')    | 121.0(3) |
| C(7')-C(8')-H(8')    | 119.5    |
| C(3')-C(8')-H(8')    | 119.5    |
| C(7)-C(8)-C(3)       | 121.3(3) |
| C(7)-C(8)-H(8)       | 119.3    |
| C(3)-C(8)-H(8)       | 119.3    |
| O(1)-C(9)-O(2)       | 121.1(2) |
| O(1)-C(9)-C(6)       | 126.5(3) |
| O(2)-C(9)-C(6)       | 112.3(2) |
| O(1')-C(9')-O(2')    | 121.9(3) |
| O(1')-C(9')-C(6')    | 125.0(3) |
| O(2')-C(9')-C(6')    | 113.1(3) |
| C(15')-C(10')-C(11') | 121.7(2) |
| C(15')-C(10')-O(2')  | 117.9(3) |
| C(11')-C(10')-O(2')  | 120.3(2) |
| C(11)-C(10)-C(15)    | 121.3(2) |
| C(11)-C(10)-O(2)     | 121.5(2) |
| C(15)-C(10)-O(2)     | 117.1(2) |
| C(10')-C(11')-C(12') | 118.4(3) |
| C(10')-C(11')-H(11') | 120.8    |
| C(12')-C(11')-H(11') | 120.8    |
| C(10)-C(11)-C(12)    | 119.1(3) |
| C(10)-C(11)-H(11)    | 120.4    |
| C(12)-C(11)-H(11)    | 120.4    |
| C(13)-C(12)-C(11)    | 120.4(2) |

|                      |          |
|----------------------|----------|
| C(13)-C(12)-H(12)    | 119.8    |
| C(11)-C(12)-H(12)    | 119.8    |
| C(13')-C(12')-C(11') | 121.2(3) |
| C(13')-C(12')-H(12') | 119.4    |
| C(11')-C(12')-H(12') | 119.4    |
| C(14')-C(13')-C(12') | 119.0(2) |
| C(14')-C(13')-C(16') | 122.8(3) |
| C(12')-C(13')-C(16') | 118.2(3) |
| C(12)-C(13)-C(14)    | 119.3(2) |
| C(12)-C(13)-C(16)    | 123.1(2) |
| C(14)-C(13)-C(16)    | 117.6(2) |
| C(15)-C(14)-C(13)    | 120.6(2) |
| C(15)-C(14)-H(14)    | 119.7    |
| C(13)-C(14)-H(14)    | 119.7    |
| C(13')-C(14')-C(15') | 120.3(3) |
| C(13')-C(14')-H(14') | 119.9    |
| C(15')-C(14')-H(14') | 119.9    |
| C(10')-C(15')-C(14') | 119.4(3) |
| C(10')-C(15')-H(15') | 120.3    |
| C(14')-C(15')-H(15') | 120.3    |
| C(14)-C(15)-C(10)    | 119.3(2) |
| C(14)-C(15)-H(15)    | 120.4    |
| C(10)-C(15)-H(15)    | 120.4    |
| O(3')-C(16')-O(4')   | 122.7(3) |
| O(3')-C(16')-C(13')  | 124.7(3) |
| O(4')-C(16')-C(13')  | 112.6(3) |
| O(3)-C(16)-O(4)      | 122.6(2) |
| O(3)-C(16)-C(13)     | 125.0(3) |
| O(4)-C(16)-C(13)     | 112.4(2) |
| C(18')-C(17')-C(22') | 121.3(3) |
| C(18')-C(17')-O(4')  | 118.9(3) |
| C(22')-C(17')-O(4')  | 119.8(3) |
| C(18)-C(17)-C(22)    | 121.4(3) |
| C(18)-C(17)-O(4)     | 119.3(3) |
| C(22)-C(17)-O(4)     | 119.2(3) |
| C(17')-C(18')-C(19') | 119.4(3) |
| C(17')-C(18')-H(18') | 120.3    |
| C(19')-C(18')-H(18') | 120.3    |
| C(17)-C(18)-C(19)    | 119.9(3) |
| C(17)-C(18)-H(18)    | 120.1    |
| C(19)-C(18)-H(18)    | 120.1    |
| C(20')-C(19')-C(18') | 120.7(3) |
| C(20')-C(19')-H(19') | 119.6    |
| C(18')-C(19')-H(19') | 119.6    |
| C(20)-C(19)-C(18)    | 119.4(3) |
| C(20)-C(19)-H(19)    | 120.3    |
| C(18)-C(19)-H(19)    | 120.3    |
| O(5)-C(20)-C(21)     | 115.7(3) |
| O(5)-C(20)-C(19)     | 124.7(3) |

|                      |          |
|----------------------|----------|
| C(21)-C(20)-C(19)    | 119.6(3) |
| C(19')-C(20')-C(21') | 119.5(3) |
| C(19')-C(20')-O(5')  | 115.8(3) |
| C(21')-C(20')-O(5')  | 124.7(3) |
| C(20')-C(21')-C(22') | 119.8(3) |
| C(20')-C(21')-H(21') | 120.1    |
| C(22')-C(21')-H(21') | 120.1    |
| C(20)-C(21)-C(22)    | 120.7(3) |
| C(20)-C(21)-H(21)    | 119.7    |
| C(22)-C(21)-H(21)    | 119.7    |
| C(17')-C(22')-C(21') | 119.3(3) |
| C(17')-C(22')-H(22') | 120.3    |
| C(21')-C(22')-H(22') | 120.3    |
| C(17)-C(22)-C(21)    | 119.0(3) |
| C(17)-C(22)-H(22)    | 120.5    |
| C(21)-C(22)-H(22)    | 120.5    |
| O(5)-C(23)-C(24)     | 107.5(3) |
| O(5)-C(23)-H(23A)    | 110.2    |
| C(24)-C(23)-H(23A)   | 110.2    |
| O(5)-C(23)-H(23B)    | 110.2    |
| C(24)-C(23)-H(23B)   | 110.2    |
| H(23A)-C(23)-H(23B)  | 108.5    |
| O(5')-C(23')-C(24')  | 106.4(3) |
| O(5')-C(23')-H(23C)  | 110.4    |
| C(24')-C(23')-H(23C) | 110.4    |
| O(5')-C(23')-H(23D)  | 110.4    |
| C(24')-C(23')-H(23D) | 110.4    |
| H(23C)-C(23')-H(23D) | 108.6    |
| C(25')-C(24')-C(23') | 112.8(3) |
| C(25')-C(24')-H(24A) | 109.0    |
| C(23')-C(24')-H(24A) | 109.0    |
| C(25')-C(24')-H(24B) | 109.0    |
| C(23')-C(24')-H(24B) | 109.0    |
| H(24A)-C(24')-H(24B) | 107.8    |
| C(25)-C(24)-C(23)    | 112.9(3) |
| C(25)-C(24)-H(24C)   | 109.0    |
| C(23)-C(24)-H(24C)   | 109.0    |
| C(25)-C(24)-H(24D)   | 109.0    |
| C(23)-C(24)-H(24D)   | 109.0    |
| H(24C)-C(24)-H(24D)  | 107.8    |
| C(24')-C(25')-C(26') | 112.9(3) |
| C(24')-C(25')-H(25A) | 109.0    |
| C(26')-C(25')-H(25A) | 109.0    |
| C(24')-C(25')-H(25B) | 109.0    |
| C(26')-C(25')-H(25B) | 109.0    |
| H(25A)-C(25')-H(25B) | 107.8    |
| C(24)-C(25)-C(26)    | 114.4(3) |
| C(24)-C(25)-H(25C)   | 108.7    |
| C(26)-C(25)-H(25C)   | 108.7    |

|                      |          |
|----------------------|----------|
| C(24)-C(25)-H(25D)   | 108.7    |
| C(26)-C(25)-H(25D)   | 108.7    |
| H(25C)-C(25)-H(25D)  | 107.6    |
| C(25')-C(26')-H(26D) | 109.5    |
| C(25')-C(26')-H(26E) | 109.5    |
| H(26D)-C(26')-H(26E) | 109.5    |
| C(25')-C(26')-H(26F) | 109.5    |
| H(26D)-C(26')-H(26F) | 109.5    |
| H(26E)-C(26')-H(26F) | 109.5    |
| C(3)-N(1)-C(1)       | 121.9(3) |
| C(3)-N(1)-C(2)       | 121.3(2) |
| C(1)-N(1)-C(2)       | 115.8(2) |
| C(3')-N(1')-C(1')    | 121.7(3) |
| C(3')-N(1')-C(2')    | 121.5(3) |
| C(1')-N(1')-C(2')    | 116.5(3) |
| C(9')-O(2')-C(10')   | 116.0(2) |
| C(9)-O(2)-C(10)      | 118.0(2) |
| C(16)-O(4)-C(17)     | 116.0(2) |
| C(16')-O(4')-C(17')  | 116.7(2) |
| C(20)-O(5)-C(23)     | 118.2(2) |
| C(20')-O(5')-C(23')  | 118.2(2) |

---

Symmetry transformations used to generate equivalent atoms:

**Table S4.** Anisotropic displacement parameters ( $\text{\AA}^2 \times 10^3$ ) for BPCPDB. The anisotropic displacement factor exponent takes the form:  $-2 \pi^2 [h^2 a^{*2} U_{11} + \dots + 2 h k a^* b^* U_{12}]$

---

|       | U11    | U22    | U33    | U23     | U13    | U12    |
|-------|--------|--------|--------|---------|--------|--------|
| C(26) | 244(6) | 138(4) | 160(4) | -118(4) | -60(4) | 16(4)  |
| C(1') | 120(3) | 151(4) | 151(4) | -121(3) | -46(3) | 22(3)  |
| C(1)  | 136(3) | 85(2)  | 103(3) | -67(2)  | -31(2) | 27(2)  |
| C(2)  | 120(3) | 96(2)  | 72(2)  | -51(2)  | -31(2) | 20(2)  |
| C(2') | 99(3)  | 161(4) | 158(4) | -128(3) | 1(3)   | 13(3)  |
| C(3)  | 62(2)  | 61(2)  | 62(2)  | -40(2)  | -11(1) | 4(1)   |
| C(3') | 67(2)  | 65(2)  | 61(2)  | -38(2)  | 4(2)   | -9(2)  |
| C(4') | 64(2)  | 70(2)  | 69(2)  | -39(2)  | -9(2)  | -5(2)  |
| C(4)  | 77(2)  | 53(2)  | 75(2)  | -36(2)  | -19(2) | 10(2)  |
| C(5') | 67(2)  | 59(2)  | 70(2)  | -37(2)  | -7(2)  | 3(2)   |
| C(5)  | 75(2)  | 57(2)  | 61(2)  | -30(2)  | -17(2) | 5(2)   |
| C(6') | 65(2)  | 48(2)  | 53(2)  | -25(1)  | -2(1)  | -5(1)  |
| C(6)  | 54(2)  | 51(2)  | 53(2)  | -29(1)  | -10(1) | 1(1)   |
| C(7)  | 68(2)  | 53(2)  | 63(2)  | -32(2)  | -11(2) | 5(1)   |
| C(7') | 63(2)  | 67(2)  | 62(2)  | -36(2)  | -4(2)  | -10(2) |
| C(8') | 61(2)  | 73(2)  | 73(2)  | -44(2)  | 0(2)   | -3(2)  |
| C(8)  | 80(2)  | 58(2)  | 55(2)  | -30(2)  | -15(2) | 9(2)   |



|        |        |        |        |        |        |        |
|--------|--------|--------|--------|--------|--------|--------|
| C(9)   | 64(2)  | 51(2)  | 59(2)  | -28(2) | -8(2)  | -1(1)  |
| C(9')  | 74(2)  | 53(2)  | 61(2)  | -28(2) | -8(2)  | 0(2)   |
| C(10') | 73(2)  | 57(2)  | 62(2)  | -38(2) | -9(2)  | -1(2)  |
| C(10)  | 76(2)  | 48(2)  | 51(2)  | -30(1) | -14(2) | 7(2)   |
| C(11') | 94(2)  | 57(2)  | 70(2)  | -34(2) | -2(2)  | -15(2) |
| C(11)  | 81(2)  | 55(2)  | 62(2)  | -30(2) | 2(2)   | -16(2) |
| C(12)  | 76(2)  | 54(2)  | 55(2)  | -28(1) | 4(2)   | -7(2)  |
| C(12') | 90(2)  | 63(2)  | 57(2)  | -28(2) | 5(2)   | -14(2) |
| C(13') | 75(2)  | 56(2)  | 52(2)  | -28(2) | -5(2)  | -6(2)  |
| C(13)  | 65(2)  | 43(2)  | 50(2)  | -24(1) | -7(1)  | 0(1)   |
| C(14)  | 72(2)  | 53(2)  | 56(2)  | -27(2) | -2(2)  | -6(1)  |
| C(14') | 93(2)  | 61(2)  | 69(2)  | -37(2) | 5(2)   | -20(2) |
| C(15') | 89(2)  | 68(2)  | 67(2)  | -40(2) | 10(2)  | -21(2) |
| C(15)  | 75(2)  | 55(2)  | 50(2)  | -27(1) | 1(1)   | -1(2)  |
| C(16') | 93(2)  | 68(2)  | 62(2)  | -38(2) | -2(2)  | -11(2) |
| C(16)  | 72(2)  | 50(2)  | 51(2)  | -25(1) | -2(2)  | 0(2)   |
| C(17') | 82(2)  | 68(2)  | 65(2)  | -43(2) | -7(2)  | -7(2)  |
| C(17)  | 88(2)  | 60(2)  | 52(2)  | -35(2) | 8(2)   | -16(2) |
| C(18') | 103(3) | 78(2)  | 70(2)  | -41(2) | -26(2) | 8(2)   |
| C(18)  | 86(2)  | 79(2)  | 67(2)  | -43(2) | -8(2)  | -2(2)  |
| C(19') | 107(3) | 76(2)  | 80(2)  | -48(2) | -33(2) | 21(2)  |
| C(19)  | 91(2)  | 66(2)  | 68(2)  | -41(2) | -2(2)  | 1(2)   |
| C(20)  | 86(2)  | 57(2)  | 53(2)  | -30(2) | 2(2)   | -12(2) |
| C(20') | 73(2)  | 74(2)  | 79(2)  | -53(2) | -14(2) | 3(2)   |
| C(21') | 106(3) | 84(2)  | 87(2)  | -56(2) | -37(2) | 18(2)  |
| C(21)  | 88(2)  | 72(2)  | 66(2)  | -38(2) | -5(2)  | 2(2)   |
| C(22') | 114(3) | 79(2)  | 92(3)  | -56(2) | -39(2) | 26(2)  |
| C(22)  | 90(2)  | 68(2)  | 67(2)  | -39(2) | 1(2)   | -1(2)  |
| C(23)  | 122(3) | 61(2)  | 64(2)  | -36(2) | -7(2)  | 2(2)   |
| C(23') | 93(2)  | 97(2)  | 83(2)  | -61(2) | -15(2) | 4(2)   |
| C(24') | 112(3) | 98(3)  | 81(2)  | -59(2) | -16(2) | 9(2)   |
| C(24)  | 140(3) | 83(2)  | 79(2)  | -53(2) | -20(2) | 12(2)  |
| C(25') | 109(3) | 128(3) | 107(3) | -81(3) | -26(2) | 15(2)  |
| C(25)  | 198(4) | 102(3) | 108(3) | -73(3) | -39(3) | 27(3)  |
| C(26') | 137(3) | 124(3) | 116(3) | -89(3) | -14(3) | 0(3)   |
| N(1)   | 105(2) | 69(2)  | 74(2)  | -50(2) | -30(2) | 22(1)  |
| N(1')  | 76(2)  | 106(2) | 101(2) | -79(2) | -4(2)  | -1(2)  |
| O(1')  | 88(2)  | 81(2)  | 90(2)  | -55(1) | -22(1) | 24(1)  |
| O(1)   | 115(2) | 66(1)  | 61(1)  | -33(1) | -24(1) | 14(1)  |
| O(2')  | 77(1)  | 73(1)  | 77(1)  | -51(1) | -10(1) | 0(1)   |
| O(2)   | 98(2)  | 52(1)  | 62(1)  | -35(1) | -22(1) | 9(1)   |
| O(3)   | 101(2) | 67(1)  | 69(1)  | -40(1) | 12(1)  | -28(1) |
| O(3')  | 158(2) | 116(2) | 93(2)  | -71(2) | 44(2)  | -57(2) |
| O(4)   | 103(2) | 73(1)  | 63(1)  | -45(1) | 17(1)  | -26(1) |
| O(4')  | 98(2)  | 76(1)  | 75(1)  | -52(1) | 4(1)   | -20(1) |
| O(5)   | 106(2) | 72(1)  | 78(1)  | -49(1) | -13(1) | -1(1)  |
| O(5')  | 114(2) | 93(2)  | 89(2)  | -66(1) | -32(1) | 21(1)  |

**Table S5.** Hydrogen coordinates (  $\times 10^4$ ) and isotropic displacement parameters ( $\text{\AA}^2 \times 10^3$ ) for BPCPDB

---

|        | x     | y     | z     | U(eq) |
|--------|-------|-------|-------|-------|
| H(26A) | 6230  | 9672  | 7724  | 238   |
| H(26B) | 5744  | 10689 | 7111  | 238   |
| H(26C) | 7213  | 10351 | 6910  | 238   |
| H(1'1) | 7076  | 6386  | -978  | 178   |
| H(1'2) | 8164  | 6211  | -1647 | 178   |
| H(1'3) | 7689  | 7252  | -1835 | 178   |
| H(1A)  | 7464  | 634   | -598  | 146   |
| H(1B)  | 6982  | 751   | -1489 | 146   |
| H(1C)  | 5943  | 379   | -633  | 146   |
| H(2A)  | 4811  | 2394  | -1854 | 135   |
| H(2B)  | 5901  | 1942  | -2312 | 135   |
| H(2C)  | 6242  | 2907  | -2272 | 135   |
| H(2'1) | 10910 | 6865  | -1428 | 180   |
| H(2'2) | 10152 | 5957  | -1371 | 180   |
| H(2'3) | 10597 | 5981  | -520  | 180   |
| H(4')  | 6858  | 7695  | -681  | 77    |
| H(4)   | 6742  | 895   | 504   | 77    |
| H(5')  | 6574  | 8523  | 164   | 74    |
| H(5)   | 6660  | 1484  | 1535  | 74    |
| H(7)   | 5716  | 4054  | -224  | 70    |
| H(7')  | 10410 | 7986  | 754   | 74    |
| H(8')  | 10721 | 7132  | -73   | 78    |
| H(8)   | 5763  | 3479  | -1265 | 74    |
| H(11') | 7695  | 8393  | 2994  | 85    |
| H(11)  | 4541  | 3871  | 2677  | 78    |
| H(12)  | 4847  | 4719  | 3492  | 73    |
| H(12') | 7405  | 9179  | 3897  | 84    |
| H(14)  | 7837  | 6288  | 1668  | 71    |
| H(14') | 10101 | 11206 | 2265  | 86    |
| H(15') | 10369 | 10434 | 1350  | 86    |
| H(15)  | 7559  | 5427  | 869   | 71    |
| H(18') | 8056  | 13114 | 3210  | 95    |
| H(18)  | 4326  | 7145  | 4157  | 88    |
| H(19') | 7885  | 14008 | 4018  | 97    |
| H(19)  | 4615  | 7947  | 5021  | 86    |
| H(21') | 9835  | 12005 | 5858  | 101   |
| H(21)  | 8031  | 6486  | 5746  | 87    |
| H(22') | 10054 | 11125 | 5024  | 103   |
| H(22)  | 7730  | 5697  | 4885  | 86    |
| H(23A) | 4877  | 8279  | 6219  | 95    |
| H(23B) | 5817  | 8994  | 5393  | 95    |
| H(23C) | 10125 | 13231 | 6246  | 99    |

|        |       |       |      |     |
|--------|-------|-------|------|-----|
| H(23D) | 8659  | 12779 | 6687 | 99  |
| H(24A) | 9420  | 14717 | 6178 | 107 |
| H(24B) | 7912  | 14324 | 6536 | 107 |
| H(24C) | 6369  | 8400  | 7150 | 112 |
| H(24D) | 7373  | 9064  | 6341 | 112 |
| H(25A) | 10131 | 13695 | 7519 | 124 |
| H(25B) | 8606  | 13346 | 7874 | 124 |
| H(25C) | 4741  | 9561  | 6775 | 150 |
| H(25D) | 5745  | 10224 | 5967 | 150 |
| H(26D) | 9502  | 15253 | 7356 | 168 |
| H(26E) | 9232  | 14506 | 8338 | 168 |
| H(26F) | 8007  | 14865 | 7767 | 168 |

**Table S<sub>6</sub>.** Torsion angles [deg] for BPCPDB

|                             |           |
|-----------------------------|-----------|
| N(1')-C(3')-C(4')-C(5')     | 177.0(3)  |
| C(8')-C(3')-C(4')-C(5')     | -2.3(4)   |
| N(1)-C(3)-C(4)-C(5)         | 179.4(3)  |
| C(8)-C(3)-C(4)-C(5)         | -0.2(4)   |
| C(3')-C(4')-C(5')-C(6')     | 0.7(4)    |
| C(3)-C(4)-C(5)-C(6)         | -0.2(4)   |
| C(4')-C(5')-C(6')-C(7')     | 1.4(4)    |
| C(4')-C(5')-C(6')-C(9')     | -177.5(2) |
| C(4)-C(5)-C(6)-C(7)         | 0.2(4)    |
| C(4)-C(5)-C(6)-C(9)         | -177.5(2) |
| C(5)-C(6)-C(7)-C(8)         | 0.3(4)    |
| C(9)-C(6)-C(7)-C(8)         | 177.9(2)  |
| C(5')-C(6')-C(7')-C(8')     | -1.9(4)   |
| C(9')-C(6')-C(7')-C(8')     | 177.0(2)  |
| C(6')-C(7')-C(8')-C(3')     | 0.3(4)    |
| N(1')-C(3')-C(8')-C(7')     | -177.5(3) |
| C(4')-C(3')-C(8')-C(7')     | 1.8(4)    |
| C(6)-C(7)-C(8)-C(3)         | -0.7(4)   |
| N(1)-C(3)-C(8)-C(7)         | -178.9(3) |
| C(4)-C(3)-C(8)-C(7)         | 0.7(4)    |
| C(7)-C(6)-C(9)-O(1)         | -174.0(3) |
| C(5)-C(6)-C(9)-O(1)         | 3.5(4)    |
| C(7)-C(6)-C(9)-O(2)         | 4.2(4)    |
| C(5)-C(6)-C(9)-O(2)         | -178.3(2) |
| C(5')-C(6')-C(9')-O(1')     | 0.3(4)    |
| C(7')-C(6')-C(9')-O(1')     | -178.6(3) |
| C(5')-C(6')-C(9')-O(2')     | -179.7(2) |
| C(7')-C(6')-C(9')-O(2')     | 1.4(4)    |
| C(15')-C(10')-C(11')-C(12') | 1.9(4)    |
| O(2')-C(10')-C(11')-C(12')  | 178.8(3)  |
| C(15)-C(10)-C(11)-C(12)     | -0.6(4)   |
| O(2)-C(10)-C(11)-C(12)      | -176.7(2) |
| C(10)-C(11)-C(12)-C(13)     | 0.4(4)    |

|                             |           |
|-----------------------------|-----------|
| C(10')-C(11')-C(12')-C(13') | -0.6(4)   |
| C(11')-C(12')-C(13')-C(14') | -1.1(4)   |
| C(11')-C(12')-C(13')-C(16') | 178.2(3)  |
| C(11)-C(12)-C(13)-C(14)     | 0.3(4)    |
| C(11)-C(12)-C(13)-C(16)     | 179.3(3)  |
| C(12)-C(13)-C(14)-C(15)     | -0.9(4)   |
| C(16)-C(13)-C(14)-C(15)     | -179.9(2) |
| C(12')-C(13')-C(14')-C(15') | 1.6(4)    |
| C(16')-C(13')-C(14')-C(15') | -177.7(3) |
| C(11')-C(10')-C(15')-C(14') | -1.4(5)   |
| O(2')-C(10')-C(15')-C(14')  | -178.4(3) |
| C(13')-C(14')-C(15')-C(10') | -0.4(5)   |
| C(13)-C(14)-C(15)-C(10)     | 0.8(4)    |
| C(11)-C(10)-C(15)-C(14)     | 0.0(4)    |
| O(2)-C(10)-C(15)-C(14)      | 176.3(2)  |
| C(14')-C(13')-C(16')-O(3')  | 174.3(3)  |
| C(12')-C(13')-C(16')-O(3')  | -5.0(5)   |
| C(14')-C(13')-C(16')-O(4')  | -4.7(4)   |
| C(12')-C(13')-C(16')-O(4')  | 176.0(3)  |
| C(12)-C(13)-C(16)-O(3)      | -176.7(3) |
| C(14)-C(13)-C(16)-O(3)      | 2.3(4)    |
| C(12)-C(13)-C(16)-O(4)      | 3.0(4)    |
| C(14)-C(13)-C(16)-O(4)      | -178.0(2) |
| C(22')-C(17')-C(18')-C(19') | 0.7(5)    |
| O(4')-C(17')-C(18')-C(19')  | -176.2(3) |
| C(22)-C(17)-C(18)-C(19)     | 1.3(4)    |
| O(4)-C(17)-C(18)-C(19)      | 179.0(2)  |
| C(17')-C(18')-C(19')-C(20') | -1.1(5)   |
| C(17)-C(18)-C(19)-C(20)     | 0.2(4)    |
| C(18)-C(19)-C(20)-O(5)      | -179.4(3) |
| C(18)-C(19)-C(20)-C(21)     | -1.6(4)   |
| C(18')-C(19')-C(20')-C(21') | 0.6(5)    |
| C(18')-C(19')-C(20')-O(5')  | 178.9(3)  |
| C(19')-C(20')-C(21')-C(22') | 0.3(5)    |
| O(5')-C(20')-C(21')-C(22')  | -177.9(3) |
| O(5)-C(20)-C(21)-C(22)      | 179.6(2)  |
| C(19)-C(20)-C(21)-C(22)     | 1.7(4)    |
| C(18')-C(17')-C(22')-C(21') | 0.1(5)    |
| O(4')-C(17')-C(22')-C(21')  | 177.1(3)  |
| C(20')-C(21')-C(22')-C(17') | -0.7(5)   |
| C(18)-C(17)-C(22)-C(21)     | -1.3(4)   |
| O(4)-C(17)-C(22)-C(21)      | -179.0(2) |
| C(20)-C(21)-C(22)-C(17)     | -0.2(4)   |
| O(5')-C(23')-C(24')-C(25')  | 174.9(3)  |
| O(5)-C(23)-C(24)-C(25)      | 176.5(3)  |
| C(23')-C(24')-C(25')-C(26') | 177.5(3)  |
| C(23)-C(24)-C(25)-C(26)     | 180.0(3)  |
| C(8)-C(3)-N(1)-C(1)         | 177.2(3)  |
| C(4)-C(3)-N(1)-C(1)         | -2.4(4)   |

|                            |           |
|----------------------------|-----------|
| C(8)-C(3)-N(1)-C(2)        | -14.0(4)  |
| C(4)-C(3)-N(1)-C(2)        | 166.4(3)  |
| C(4')-C(3')-N(1')-C(1')    | 1.5(5)    |
| C(8')-C(3')-N(1')-C(1')    | -179.2(3) |
| C(4')-C(3')-N(1')-C(2')    | 174.6(3)  |
| C(8')-C(3')-N(1')-C(2')    | -6.1(5)   |
| O(1')-C(9')-O(2')-C(10')   | 1.5(4)    |
| C(6')-C(9')-O(2')-C(10')   | -178.5(2) |
| C(15')-C(10')-O(2')-C(9')  | -115.8(3) |
| C(11')-C(10')-O(2')-C(9')  | 67.1(3)   |
| O(1)-C(9)-O(2)-C(10)       | 8.2(4)    |
| C(6)-C(9)-O(2)-C(10)       | -170.1(2) |
| C(11)-C(10)-O(2)-C(9)      | -71.2(3)  |
| C(15)-C(10)-O(2)-C(9)      | 112.5(3)  |
| O(3)-C(16)-O(4)-C(17)      | -2.5(4)   |
| C(13)-C(16)-O(4)-C(17)     | 177.8(2)  |
| C(18)-C(17)-O(4)-C(16)     | 104.4(3)  |
| C(22)-C(17)-O(4)-C(16)     | -77.8(3)  |
| O(3')-C(16')-O(4')-C(17')  | 0.7(5)    |
| C(13')-C(16')-O(4')-C(17') | 179.8(2)  |
| C(18')-C(17')-O(4')-C(16') | -105.8(3) |
| C(22')-C(17')-O(4')-C(16') | 77.2(4)   |
| C(21)-C(20)-O(5)-C(23)     | 174.0(2)  |
| C(19)-C(20)-O(5)-C(23)     | -8.2(4)   |
| C(24)-C(23)-O(5)-C(20)     | -174.4(2) |
| C(19')-C(20')-O(5')-C(23') | 176.9(3)  |
| C(21')-C(20')-O(5')-C(23') | -4.8(4)   |
| C(24')-C(23')-O(5')-C(20') | 179.7(2)  |

---

Symmetry transformations used to generate equivalent atoms:

| Table   | S <sub>7</sub> . | Hydrogen | bonds    | for      | BPCPDB | [Å | and | deg.] |
|---------|------------------|----------|----------|----------|--------|----|-----|-------|
| <hr/>   |                  |          |          |          |        |    |     |       |
| —       |                  |          |          |          |        |    |     |       |
| D-H...A |                  | d(D-H)   | d(H...A) | d(D...A) | <(DHA) |    |     |       |



## checkCIF/PLATON report

You have not supplied any structure factors. As a result the full set of tests cannot be run.

THIS REPORT IS FOR GUIDANCE ONLY. IF USED AS PART OF A REVIEW PROCEDURE FOR PUBLICATION, IT SHOULD NOT REPLACE THE EXPERTISE OF AN EXPERIENCED CRYSTALLOGRAPHIC REFEREE.

No syntax errors found.      CIF dictionary      Interpreting this report

### Datablock: fin

---

Bond precision:    C-C = 0.0044 A                      Wavelength=0.71073

Cell:                a=9.8058 (2)                b=15.4400 (3)                c=16.9339 (3)  
                      alpha=64.933 (1)            beta=83.409 (1)            gamma=88.318 (1)

Temperature:        293 K

|                | Calculated   | Reported     |
|----------------|--------------|--------------|
| Volume         | 2306.46 (8)  | 2306.46 (8)  |
| Space group    | P -1         | P -1         |
| Hall group     | -P 1         | -P 1         |
| Moiety formula | C26 H27 N O5 | C26 H27 N O5 |
| Sum formula    | C26 H27 N O5 | C26 H27 N O5 |
| Mr             | 433.49       | 433.49       |
| Dx, g cm-3     | 1.248        | 1.248        |
| Z              | 4            | 4            |
| Mu (mm-1)      | 0.086        | 0.086        |
| F000           | 920.0        | 920.0        |
| F000'          | 920.46       |              |
| h, k, lmax     | 12, 19, 21   | 12, 19, 21   |
| Nref           | 9523         | 9485         |
| Tmin, Tmax     | 0.985, 0.991 | 0.983, 0.991 |
| Tmin'          | 0.983        |              |

Correction method= # Reported T Limits: Tmin=0.983 Tmax=0.991  
AbsCorr = MULTI-SCAN

Data completeness= 0.996                      Theta(max) = 26.450

R(reflections) = 0.0510 ( 3907)                wR2(reflections) = 0.1445 ( 9485)

S = 0.927                                          Npar = 583

---

The following ALERTS were generated. Each ALERT has the format  
**test-name\_ALERT\_alert-type\_alert-level.**  
Click on the hyperlinks for more details of the test.

---

**Alert level A**

DIFF003\_ALERT\_1\_A \_diffrn\_measurement\_device\_type is missing  
Diffractionmeter make and type. Replaces \_diffrn\_measurement\_type.

---

**Alert level C**

|                   |                                                  |             |
|-------------------|--------------------------------------------------|-------------|
| PLAT026_ALERT_3_C | Ratio Observed / Unique Reflections too Low .... | 41 %        |
| PLAT220_ALERT_2_C | Large Non-Solvent C Ueq(max)/Ueq(min) Range      | 3.2 Ratio   |
| PLAT242_ALERT_2_C | Low Ueq as Compared to Neighbors for .....       | N1' Check   |
| PLAT242_ALERT_2_C | Low Ueq as Compared to Neighbors for .....       | C20' Check  |
| PLAT250_ALERT_2_C | Large U3/U1 Ratio for Average U(i,j) Tensor .... | 2.1 Note    |
| PLAT334_ALERT_2_C | Small Average Benzene C-C Dist. C10' -C15'       | 1.37 Ang.   |
| PLAT334_ALERT_2_C | Small Average Benzene C-C Dist. C17' -C22'       | 1.37 Ang.   |
| PLAT340_ALERT_3_C | Low Bond Precision on C-C Bonds .....            | 0.0044 Ang. |

---

**Alert level G**

|                   |                                                               |                |
|-------------------|---------------------------------------------------------------|----------------|
| PLAT005_ALERT_5_G | No _iucr_refine_instructions_details in the CIF               | Please Do !    |
| PLAT066_ALERT_1_G | Predicted and Reported Tmin&Tmax Range Identical              | ? Check        |
| PLAT093_ALERT_1_G | No su's on H-positions, refinement reported as .              | mixed Check    |
| PLAT154_ALERT_1_G | The su's on the Cell Angles are Equal .....                   | 0.00100 Degree |
| PLAT199_ALERT_1_G | Reported _cell_measurement_temperature .....                  | 293 Check      |
| PLAT200_ALERT_1_G | Reported _diffrn_ambient_temperature .....                    | 293 Check      |
| PLAT380_ALERT_4_G | Incorrectly? Oriented X(sp <sup>2</sup> )-Methyl Moiety ..... | C2 Check       |
| PLAT720_ALERT_4_G | Number of Unusual/Non-Standard Labels .....                   | 6 Note         |
| PLAT899_ALERT_4_G | SHELXL97 is Deprecated and Succeeded by SHELXL                | 2014 Note      |

---

- 1 **ALERT level A** = Most likely a serious problem - resolve or explain  
0 **ALERT level B** = A potentially serious problem, consider carefully  
8 **ALERT level C** = Check. Ensure it is not caused by an omission or oversight  
9 **ALERT level G** = General information/check it is not something unexpected
- 6 ALERT type 1 CIF construction/syntax error, inconsistent or missing data  
6 ALERT type 2 Indicator that the structure model may be wrong or deficient  
2 ALERT type 3 Indicator that the structure quality may be low  
3 ALERT type 4 Improvement, methodology, query or suggestion  
1 ALERT type 5 Informative message, check
-



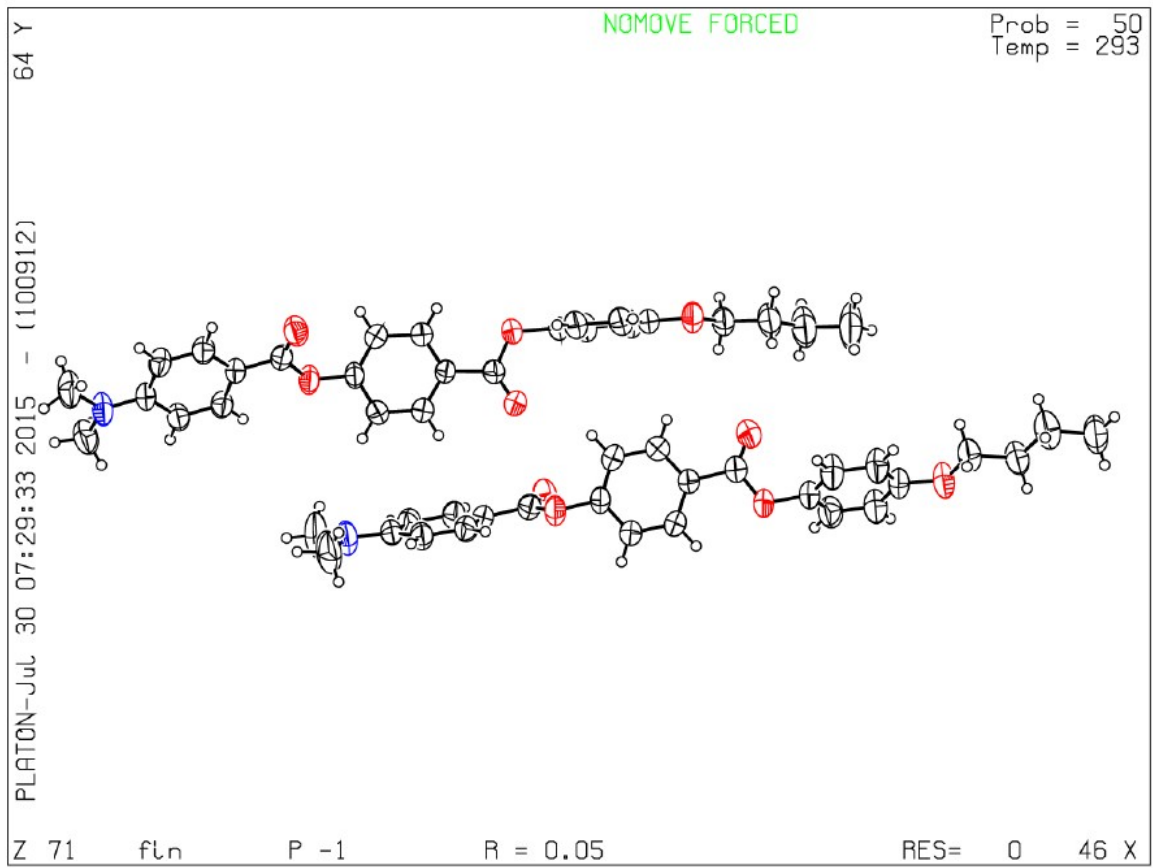

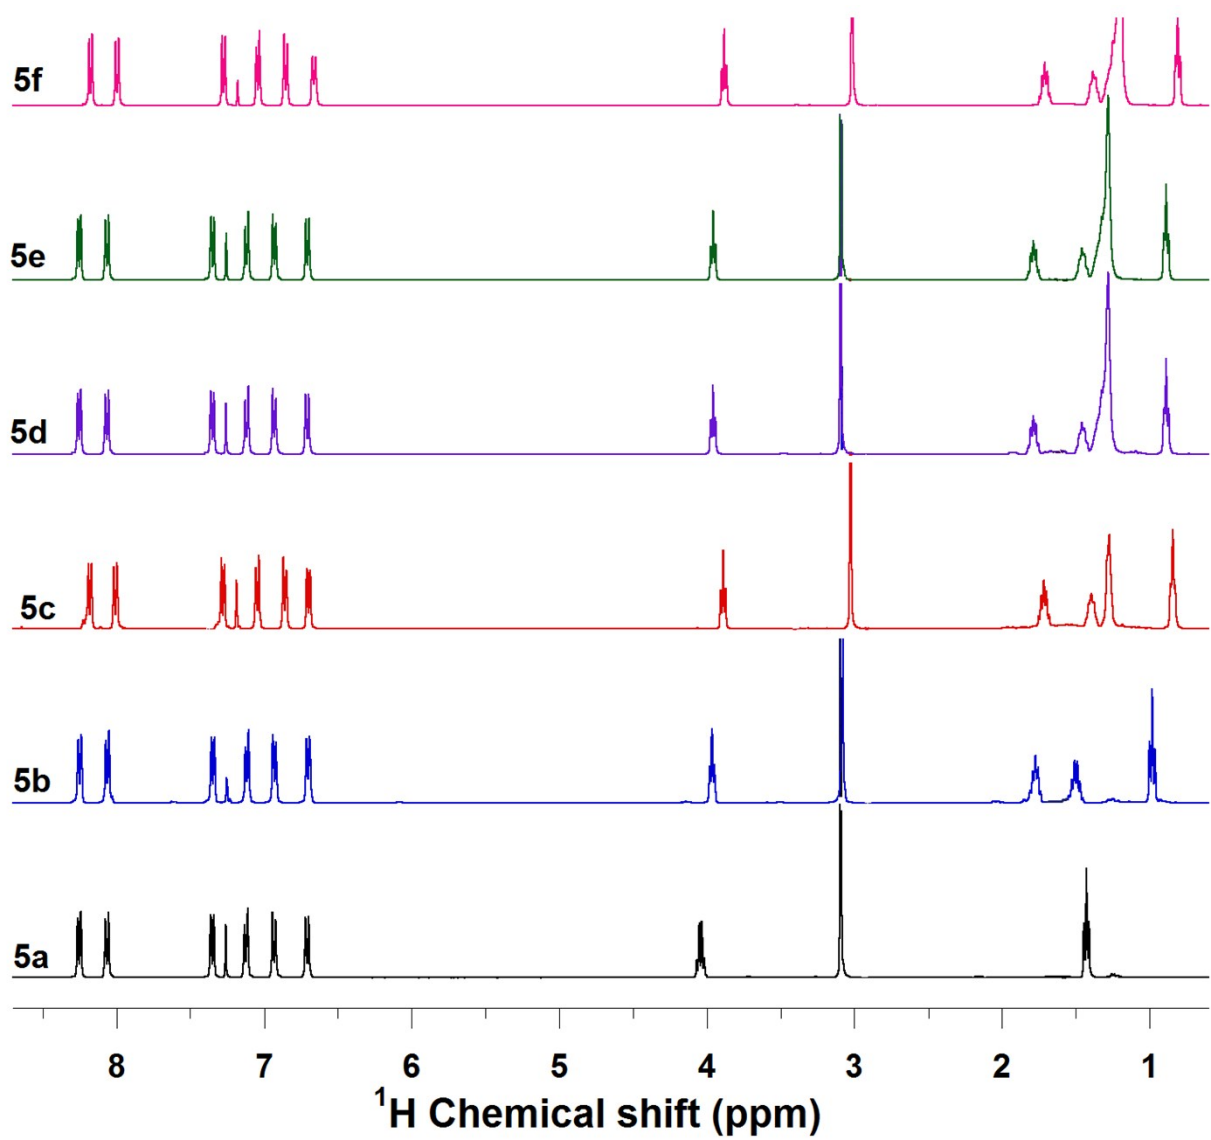

**Figure S<sub>1</sub>:** Solution  $^1\text{H}$  NMR spectra of synthesized mesogens {5(a-f)}

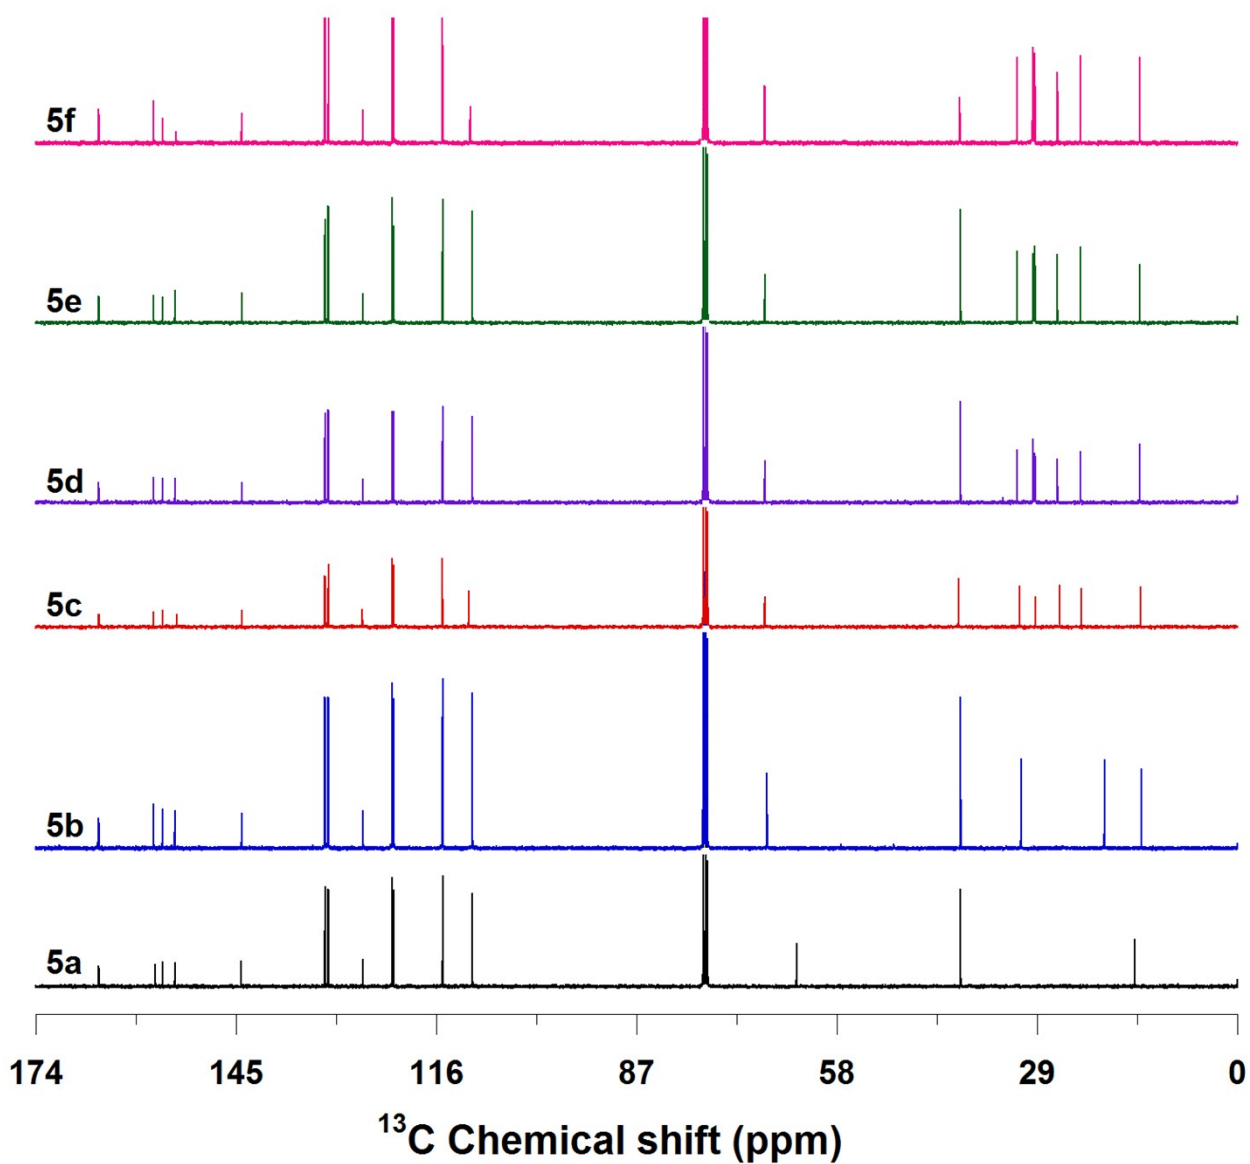

**Figure S<sub>2</sub>:** Solution proton decoupled  $^{13}\text{C}$  NMR spectra of synthesized mesogens {5(a-f)}

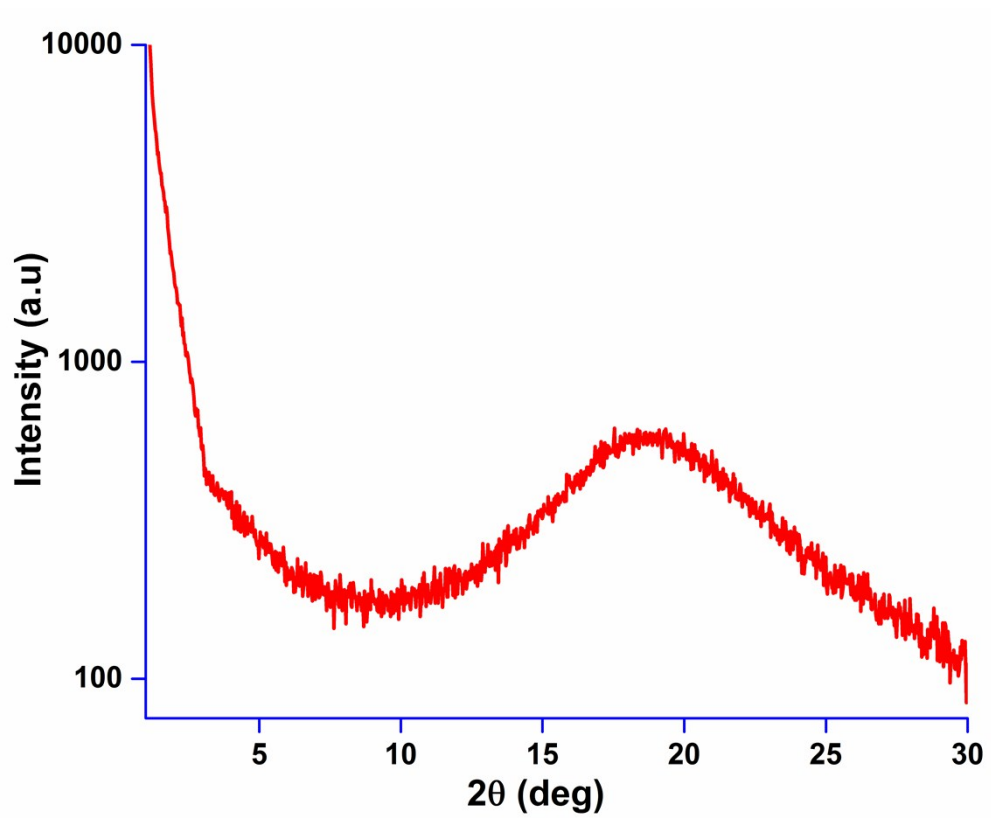

**Figure S<sub>3</sub>:** Powder X-ray diffraction profile for DdPCPDB in nematic phase at 180 °C

## Notes and References

1. M. E. Neubert, Jr. S. J. Laskos, L. J. Maurer, L. T. Carlino and J. P. Ferrato, *Mol. Cryst. Liq. Cryst.* 1978, **44**, 197-210.
2. G. S. Lee, Y. J. Lee, S. Y. Choi, Y. S. Park and K. B. Yoon, *J. Am. Chem. Soc.* 2000, **122**, 12151-12157.
3. B. Kosata, G. M. Tamba, U. Baumeister, K. Pelz, S. Diele, G. Pelzl, G. Galli, S. Samaritani, E.V. Agina, N. I. Boiko, V. P. Shibaev, and W. Weissflog, *Chem. Mater.* 2006, **18**, 691-701.
